# Supplementary material for: Haploinsufficiency of the NF1 gene is associated with protection against diabetes
Source: PubMed Central journal article supplement — J Med Genet. 2020 Jun 22;58(6):378–84. doi: 10.1136/jmedgenet-2020-107062 (PMC8142421; doi:10.1136/jmedgenet-2020-107062), 2020-06-22
Supplement: jmedgenet-2020-107062supp001.pdf [file jmedgenet-2020-107062supp001.pdf]

**Table S1.** Complications reported in type 1 diabetes (T1D) –related hospital encounters during follow-up 1998–2014.

|                                                                   | Patients with NF1 | Controls   | Siblings without NF1 |
|-------------------------------------------------------------------|-------------------|------------|----------------------|
| All patients identified to have T1D, n                            | 7                 | 129        | 19                   |
| Patients with T1D-related hospital encounter, n (%)               | 7 (100)           | 129 (100)  | 19 (100)             |
| Complications of T1D                                              |                   |            |                      |
| <i>Hypoglycemic coma (ICD-10 E10.00), n (%)</i>                   | 1 (14.3)          | 16 (12.4)  | 2 (10.5)             |
| <i>Hyperglycemic coma (ICD-10 E10.01), n (%)</i>                  | 0 (0)             | 2 (1.6)    | 0 (0)                |
| <i>Coma (ICD-10 E10.09), n (%)</i>                                | 0 (0)             | 0 (0)      | 0 (0)                |
| <i>Ketoacidosis (ICD-10 E10.1), n (%)</i>                         | 2 (28.6)          | 16 (12.4)  | 4 (21.1)             |
| <i>Renal complications (ICD-10 E10.2), n (%)</i>                  | 0 (0)             | 11 (8.5)   | 0 (0)                |
| <i>Ophthalmic complications (ICD-10 E10.3), n (%)</i>             | 1 (14.3)          | 48 (37.2)  | 8 (42.1)             |
| <i>Neurological complications (ICD-10 E10.4), n (%)</i>           | 0 (0)             | 8 (6.2)    | 0 (0)                |
| <i>Peripheral circulatory complications (ICD-10 E10.5), n (%)</i> | 1 (14.3)          | 8 (6.2)    | 1 (5.3)              |
| <i>Other complications (ICD-10 E10.6), n (%)</i>                  | 0 (0)             | 5 (3.9)    | 1 (5.3)              |
| <i>Multiple complications (ICD-10 E10.7), n (%)</i>               | 1 (14.3)          | 26 (20.2)  | 2 (10.5)             |
| <i>Unspecified complications (ICD-10 E10.8), n (%)</i>            | 1 (14.3)          | 3 (2.3)    | 1 (5.3)              |
| <i>Without complications (ICD-10 E10.9), n (%)</i>                | 7 (100)           | 115 (89.1) | 17 (89.5)            |

ICD-10: International Classification of Diseases, 10<sup>th</sup> revision; NF1: neurofibromatosis type 1; T1D: type 1 diabetes

**Table S2.** Complications reported in type 2 diabetes (T2D) –related hospital encounters during follow-up 1998–2014.

|                                                                   | Patients with NF1 | Controls   | Siblings without NF1 |
|-------------------------------------------------------------------|-------------------|------------|----------------------|
| All patients identified to have T2D, n                            | 19                | 779        | 83                   |
| Patients with T2D-related hospital encounter, n (%)               | 7 (36.8)          | 312 (40.1) | 27 (32.5)            |
| Complications of T2D                                              |                   |            |                      |
| <i>Hypoglycemic coma (ICD-10 E11.00), n (%)</i>                   | 3 (15.8)          | 45 (5.8)   | 4 (4.8)              |
| <i>Hyperglycemic coma (ICD-10 E11.01), n (%)</i>                  | 0 (0)             | 2 (0.3)    | 1 (1.2)              |
| <i>Coma (ICD-10 E11.09), n (%)</i>                                | 0 (0)             | 1 (0.1)    | 1 (1.2)              |
| <i>Ketoacidosis (ICD-10 E11.1), n (%)</i>                         | 0 (0)             | 3 (0.4)    | 0 (0)                |
| <i>Renal complications (ICD-10 E11.2), n (%)</i>                  | 0 (0)             | 11 (1.4)   | 2 (2.4)              |
| <i>Ophthalmic complications (ICD-10 E11.3), n (%)</i>             | 0 (0)             | 21 (2.7)   | 2 (2.4)              |
| <i>Neurological complications (ICD-10 E11.4), n (%)</i>           | 1 (5.3)           | 11 (1.4)   | 0 (0)                |
| <i>Peripheral circulatory complications (ICD-10 E11.5), n (%)</i> | 1 (5.3)           | 15 (1.9)   | 0 (0)                |
| <i>Other complications (ICD-10 E11.6), n (%)</i>                  | 0 (0)             | 6 (0.8)    | 1 (1.2)              |
| <i>Multiple complications (ICD-10 E11.7), n (%)</i>               | 1 (5.3)           | 35 (4.5)   | 5 (6.0)              |
| <i>Unspecified complications (ICD-10 E11.8), n (%)</i>            | 2 (10.5)          | 45 (5.8)   | 2 (2.4)              |
| <i>Without complications (ICD-10 E11.9), n (%)</i>                | 5 (26.3)          | 255 (32.7) | 22 (26.5)            |

ICD-10: International Classification of Diseases, 10<sup>th</sup> revision; NF1: neurofibromatosis type 1; T2D: type 2 diabetes
